# Supplementary material for: A Simple and Universal Nucleic Acid Assay Platform Based on Personal Glucose Meter Using SARS-CoV-2 N Gene as the Model
Source: Biosensors (Basel). 2022 Apr 15;12(4):249. doi: 10.3390/bios12040249 (PMC9025369; doi:10.3390/bios12040249)
Supplement: Supplementary file 1 [file biosensors-12-00249-s001.zip › biosensors-1654502-supplementary.pdf]

## Supporting Information

### **A Simple and Universal Nucleic Acid Assay Platform Based on Personal Glucose Meter Using SARS-CoV-2 N Gene as the Model**

Tian Li\*, Rui Pan, Yuhan Wen, Jiaqi Xu, Liping Zhang, Suna He, and Gaofeng Liang

*School of Basic Medical Sciences, Henan University of Science and Technology, Luoyang 471023, China.*

#### **Table of Contents**

|                                                      |     |
|------------------------------------------------------|-----|
| N gene sequence.....                                 | S-2 |
| Supplementary experimental information .....         | S-3 |
| Supplementary Figures and Table.....                 | S-5 |
| Working principle of the personal glucose meter..... | S-7 |

\*Corresponding author:

E-mail address: litian90507@163.com

## N-gene sequence

Target gene sequence of severe acute respiratory syndrome coronavirus 2 isolate Wuhan-Hu-1  
gene="N" (1260 number of nucleotide bases)

Accession NC\_045512

CDS 1..1260

/product="nucleocapsid phosphoprotein"

/protein\_id="YP\_009724397.2"

/translation="MSDNGPQNQRNAPRITFGGPSDSTGSNQNGERSGARSKQRRPQG

LPNNTASWFTALTQHGKEDLKFPRGQGVPIINTNSSPDDQIGYYRRATRRIRGGDGKMK  
DLSRWYFYLLGTGPEAGLPYGANKDGIWVATEGALNTPKDHIGTRNPANNAIVLQ  
LPQGTTLPGKFYAEGSRGGSQASSRSSSRNNSSTPGSSRGTSPARMAGNGGDAA  
LALLLLDRLNQLESKMSGKGQQQQGQTVTKKSAAEASKKPRQKRTATKAYNVTQAFGR  
RGPEQTQGNFGDQELIRQGTDYKHWPIAQFAPSASAFFGMSRIGMEVTPSGTWLTYT  
GAIKLDDKDPNFKDQVILLNKHIDAYKTFPTEPKDKKKKADETQALPQRQKKQQT  
V  
TLLPAADLDDFSKQLQQSMSSADSTQA"

## ORIGIN

```
1   atgtctgata atggaccca aaatcagcga aatgcacccc gcattacgtt tggaggaccc
61  tcagattcaa ctggcagtaa ccagaatgga gaacgcagtg gggcgcgatc aaaacaacgt
121 cggccccaag gtttaccaa taatactgeg tcttggtca cgcctctcac tcaacatggc
181 aaggaagacc ttaattccc tcgaggacaa ggcgttccaa ttaacacaa tagcagtcca
241 gatgacaaa ttggctacta ccgaagagct accagacgaa ttcgtggtgg tgacggtaaa
301 atgaaagatc tcagtccaag atggtatttc tactacctag gaactgggcc agaagctgga
361 ctccctatg gtgctaacia agacggcatc atatgggttg caactgaggg agccttgaat
421 acacaaaag atcacattgg caccgcaat cctgctaaca atgtgcaat cgtgctacia
481 ctctctcaag gaacaacatt gccaaaaggc ttctacgcag aaggagcag aggcggcagt
541 caagcctctt ctggtctc atcacgtagt cgcaacagt caagaaatc aactccaggc
601 agcagtaggg gaactctcc tgctagaatg gctggcaatg gcggtgatgc tgctctgct
661 ttgctgctgc ttgacagatt gaaccagctt gagagcaaaa tgcctggtaa aggccaacia
721 caacaaggcc aaactgtcac taagaaatct gctgctgagg ctctaagaa gcctcgcaa
781 aaacgtactg ccactaaagc atacaatga acacaagctt tcggcagacg tggccagaa
841 caaaccaag gaaattttgg ggaccaggaa ctaatcagac aaggaactga ttacaacat
901 tggccgcaaa ttgcacaatt tgccccagc gcttcagcgt tcttcggaat gtcgcgcatt
961 ggcattggaag tcacacctc gggaacgtgg ttgacctaca caggtgcat caaattggat
1021 gacaaagatc caaatttcaa agatcaagtc attttgctga ataagcatat tgacgcatac
1081 aaaacattcc caccaacaga gcctaaaaag gacaaaaaga agaaggctga tgaaactcaa
1141 gccttaccgc agagacagaa gaaacagcaa actgtgactc ttctctgc tgacagattg
1201 gatgatttct ccaacaatt gcaacaatcc atgagcagtg ctgactcaac tcaggcctaa
```

### **Optimization of reaction time for invertase catalysis**

The experimental group consisted of 2  $\mu\text{L}$  of Probe1–invertase (10 mg/mL, the concentration of invertase represent the concentration of Probe1–invertase), 100  $\mu\text{L}$  of 20 nM target nucleic acid and 1  $\mu\text{L}$  of 10  $\mu\text{M}$  Probe2. The final concentrations of Probe1–invertase, Probe2, and target DNAs were 0.2 mg/mL, 100 nM, and 20 nM, respectively. The control group consisted of 2  $\mu\text{L}$  of Probe1–invertase, 100  $\mu\text{L}$  buffer A and 1  $\mu\text{L}$  of 10  $\mu\text{M}$  Probe2. The final concentrations of Probe1–invertase, Probe2, and target DNAs were 0.2 mg/mL, 100 nM, and 0, respectively. The mixture was cooled from 37  $^{\circ}\text{C}$  to 25  $^{\circ}\text{C}$  to allow the DNAs to hybridize and form the sandwich structure (Probe1–invertase & target & Probe2). Then 10  $\mu\text{L}$  of 10 mg/mL streptavidin-conjugated magnetic beads (streptavidin-MBs) were added to the mixture and the mixture was kept at room temperature for 30 min to allow formation assemblies of streptavidin-MBs with the sandwich structure. The assemblies, along with unattached MBs was magnetically separated and washed with buffer A three times. Finally, 100  $\mu\text{L}$  1 M sucrose was added, and the mixture was allowed to react at 37  $^{\circ}\text{C}$  for 20 min, 40 min, 60 min, 80 min, 100 min, 120 min and 140 min, respectively. The glucose content in each tube were finally measured using the PGM and the signal ratio of experimental group and control group was calculated respectively.

### **Optimization of the amount of DNA-invertase conjugates**

In experimental group, 0.2  $\mu\text{L}$ , 0.4  $\mu\text{L}$ , 0.6  $\mu\text{L}$ , 0.8  $\mu\text{L}$ , 1  $\mu\text{L}$ , 2  $\mu\text{L}$ , 5  $\mu\text{L}$  and 8  $\mu\text{L}$  of Probe1–invertase (10 mg/mL, the concentration of invertase represent the concentration of Probe1–invertase) are diluted to 100  $\mu\text{L}$  in different tubes. Then, 1  $\mu\text{L}$  of 1  $\mu\text{M}$  target nucleic acid and 1  $\mu\text{L}$  of 10  $\mu\text{M}$  Probe2 are added to each tube. In control group, 1  $\mu\text{L}$  of 1  $\mu\text{M}$  target nucleic acid was replaced of 1  $\mu\text{L}$  buffer A. The dosage of Probe1–invertase and Probe2 are the same as those of the experimental group. The mixture was cooled from 37  $^{\circ}\text{C}$  to 25  $^{\circ}\text{C}$  to allow the DNAs to hybridize and form the sandwich structure (Probe1–invertase & target & Probe2). Then 10  $\mu\text{L}$  of 10 mg/mL streptavidin-MBs were added to the mixture and the mixture was kept at room temperature for 30 min to allow formation assemblies of streptavidin-MBs with the sandwich structure. The assemblies, along with unattached MBs was magnetically separated and washed with buffer A three times. Finally, 100  $\mu\text{L}$  1 M sucrose was added, and the mixture was allowed to react at 37  $^{\circ}\text{C}$  for 120 min. The glucose content in each tube were finally measured using the PGM and the signal ratio of experimental group and control group was calculated respectively.

### **Optimization of the amount of magnetic beads**

The experimental group consisted of 1  $\mu\text{L}$  of Probe1–invertase (10 mg/mL, the concentration of invertase represent the concentration of Probe1–invertase), 100  $\mu\text{L}$  of 10 nM target nucleic acid and 1  $\mu\text{L}$  of 10  $\mu\text{M}$  Probe2. The final concentrations of Probe1–invertase, Probe2, and target DNAs were 0.1 mg/mL, 100 nM, and 10 nM, respectively. The control group consisted of 1  $\mu\text{L}$  of Probe1–invertase, 100  $\mu\text{L}$  buffer A and 1  $\mu\text{L}$  of 10  $\mu\text{M}$  Probe2. The final concentrations of Probe1–invertase, Probe2, and target DNAs were 0.1 mg/mL, 100 nM, and 0, respectively. The mixture was cooled from 37  $^{\circ}\text{C}$  to 25  $^{\circ}\text{C}$  to allow the DNAs to hybridize and form the sandwich structure (Probe1–invertase & target & Probe2). Then 1  $\mu\text{L}$ , 3  $\mu\text{L}$ , 5  $\mu\text{L}$ , 8  $\mu\text{L}$  and 10  $\mu\text{L}$  of 10 mg/mL streptavidin-MBs were added to each tube and the mixture was kept at room temperature for 30 min to allow formation assemblies of streptavidin-MBs with the sandwich structure. The assemblies, along with unattached MBs was magnetically separated and washed with buffer A three times. Finally, 100  $\mu\text{L}$  1 M sucrose was added, and the mixture was allowed to react at 37  $^{\circ}\text{C}$  for 120 min. The glucose content in each tube were finally measured using the PGM and the

signal ratio of experimental group and control group was calculated respectively.

#### **Optimization of the incubation time**

The experimental group consisted of 1  $\mu$ L of Probe1–invertase (10 mg/mL, the concentration of invertase represent the concentration of Probe1–invertase), 100  $\mu$ L of 10 nM target nucleic acid and 1  $\mu$ L of 10  $\mu$ M Probe2. The final concentrations of Probe1–invertase, Probe2, and target DNAs were 0.1 mg/mL, 100 nM, and 10 nM, respectively. The control group consisted of 1  $\mu$ L of Probe1–invertase, 100  $\mu$ L buffer A and 1  $\mu$ L of 10  $\mu$ M Probe2. The final concentrations of Probe1–invertase, Probe2, and target DNAs were 0.1 mg/mL, 100 nM, and 0, respectively. The mixture was cooled from 37 °C to 25 °C to allow the DNAs to hybridize and form the sandwich structure (Probe1–invertase & target & Probe2). Then 8  $\mu$ L of 10 mg/mL streptavidin-MBs were added to each tube and the mixture was kept at room temperature for 15 min, 30 min, 45 min, 60 min and 90 min, respectively. Then, the assemblies, along with unattached MBs was magnetically separated and washed with buffer A three times. Finally, 100  $\mu$ L 1 M sucrose was added, and the mixture was allowed to react at 37 °C for 120 min. The glucose content in each tube were finally measured using the PGM and the signal ratio of experimental group and control group was calculated respectively.

**Table S1** Binding energy of different recognition site with their capture probes

| starting<br>target<br>position | ending<br>target<br>position | Probe1<br>(5'-3')                           | Probe2<br>(5'-3')                               | GC<br>content | binding<br>energy<br>(kcal/mol) |
|--------------------------------|------------------------------|---------------------------------------------|-------------------------------------------------|---------------|---------------------------------|
| 421                            | 460                          | CCAATGTGATCTTT<br>TGGTGT <sub>A20</sub> /HS | biotin/A <sub>10</sub> TGTTAGCAG<br>GATTGCGGGTG | 47.5 %        | -64.90                          |
| 481                            | 520                          | AATGTTGTTCCTTG<br>AGGAAGA <sub>20</sub> /HS | biotin/A <sub>10</sub> CTGCGTAGA<br>AGCCTTTTGGC | 47.5 %        | -65.48                          |
| 601                            | 640                          | GGAGAAGTTCCCC<br>TACTGCTA <sub>20</sub> /HS | biotin/A <sub>10</sub> CATTGCCAG<br>CCATTCTAGCA | 52.5 %        | -66.43                          |
| 661                            | 700                          | AATCTGTCAAGCA<br>GCAGCAAA <sub>20</sub> /HS | biotin/A <sub>10</sub> TTTTGCTCTC<br>AAGCTGGTTC | 45.0%         | -64.59                          |
| 681                            | 720                          | TTTGCTCTCAAGC<br>TGGTTCA <sub>20</sub> /HS  | biotin/A <sub>10</sub> TTGTTGGCCT<br>TTACCAGACA | 45.0%         | -64.89                          |

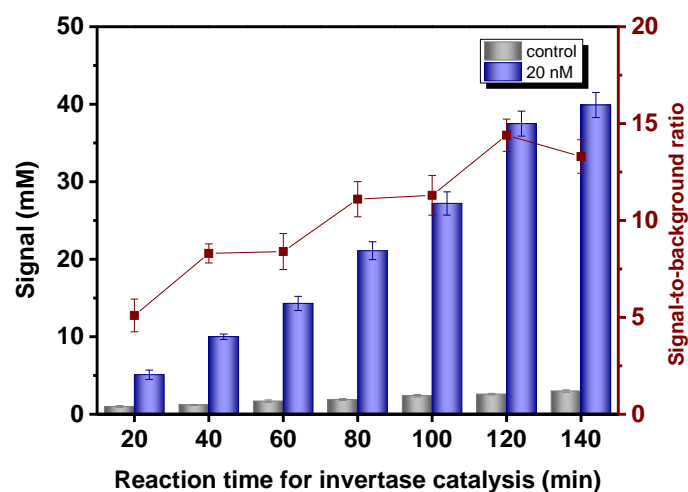**Figure S1.** Optimization of reaction time for invertase catalysis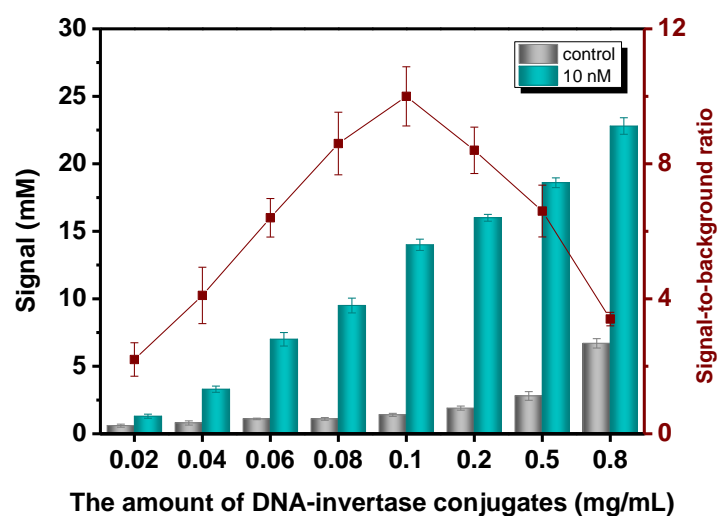**Figure S2.** Optimization of the amount of DNA-invertase conjugates

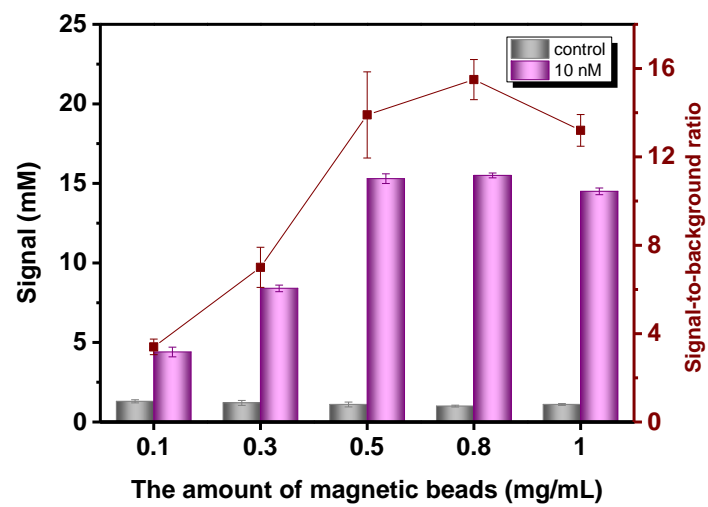

Figure S3. Optimization of the amount of magnetic beads

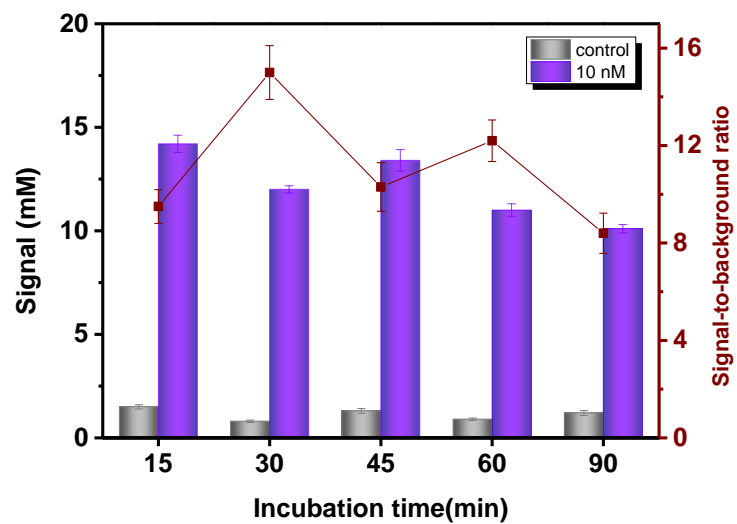

Figure S4. Optimization of the incubation time

### Working principle of the personal glucose meter

The principle of the glucose meter (ACCU-CHEK® Active, Roche Diagnostics GmbH) used in this work is chemical colorimetry. Each test paper has a test area containing chemical reagents. When the sample is added to the test area, glucose dehydrogenase reacts with glucose. In the subsequent chemical reaction, the color of the test area changes. Based on the principle of photometer, the blood glucose meter can convert the obtained signal into glucose value according to the color change. The reaction process is as follows.

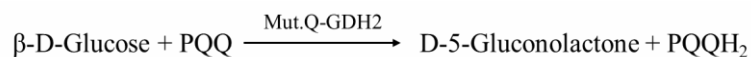

PQQ: pyrroloquinoline quinone    Mut.Q-GDH2: mutant modified glucose dehydrogenase
